# Supplementary figures and images for: A silent agonist of α7 nicotinic acetylcholine receptors modulates inflammation ex vivo and attenuates EAE
Source: PubMed Central journal article supplement — Brain Behav Immun. Author manuscript; Available in PMC 2020 Nov 2. (PMC7604877; doi:10.1016/j.bbi.2019.12.014), 2019-12-23

**A**  
**m-bromo PEP**

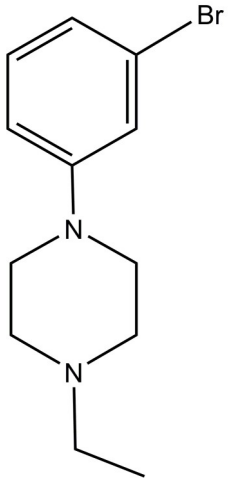

**B**

**$\alpha$ 7 Responses to m-bromo PEP**

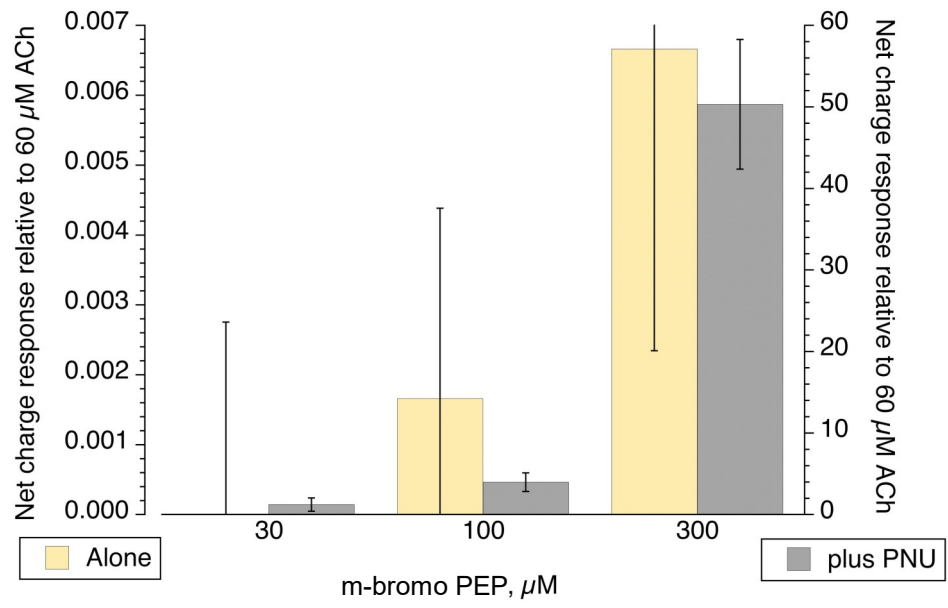

Supplement: NIHMS1548799-supplement-1.pdf [file NIHMS1548799-supplement-1.pdf]

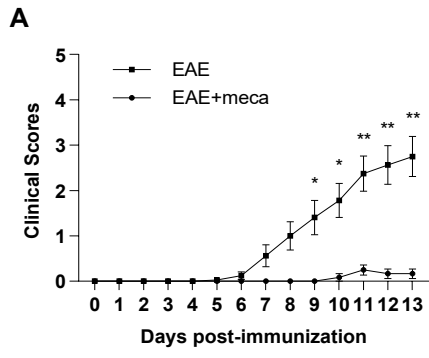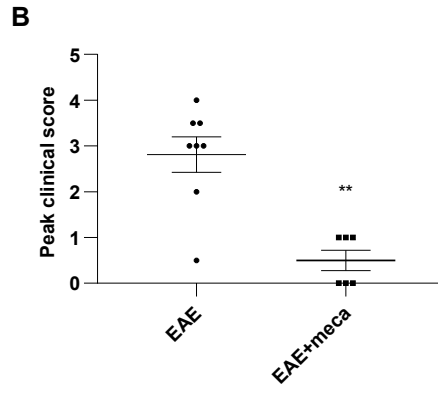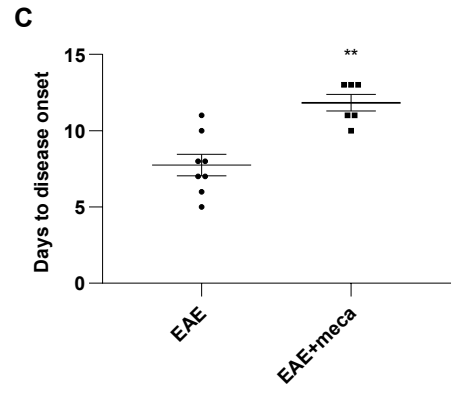

Supplement: NIHMS1548799-supplement-2.pdf [file NIHMS1548799-supplement-2.pdf]

**A**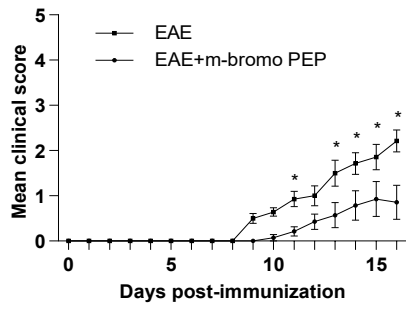**B**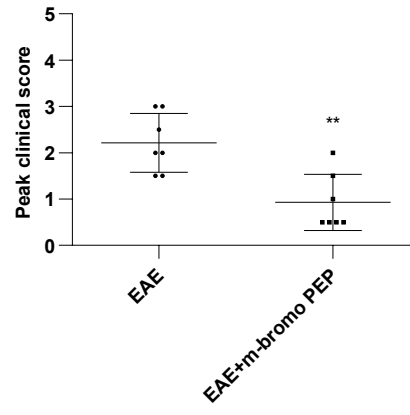**C**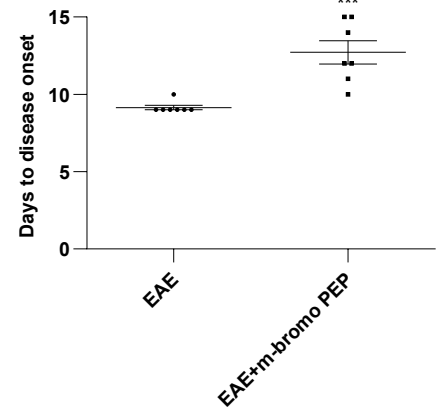

Supplement: NIHMS1548799-supplement-3.pdf [file NIHMS1548799-supplement-3.pdf]

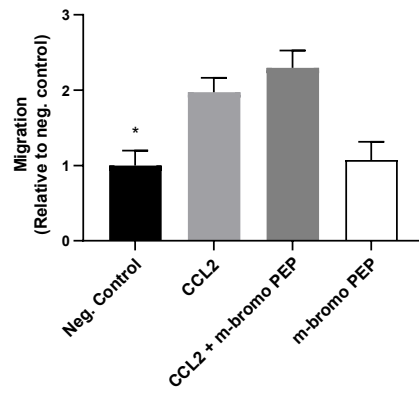

Supplement: NIHMS1548799-supplement-4.pdf [file NIHMS1548799-supplement-4.pdf]

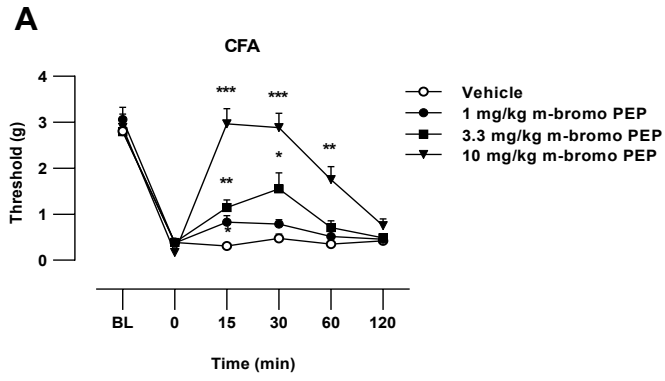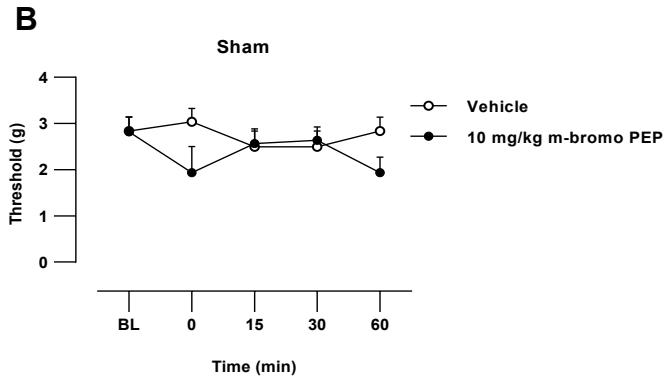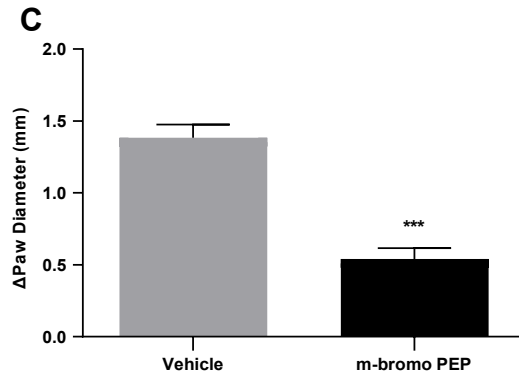

Supplement: NIHMS1548799-supplement-5.pdf [file NIHMS1548799-supplement-5.pdf]
